# Supplementary material
Source: publisher site journal article supplement (https://www.dovepress.com/article/346141)
Supplement: Supplementary file 1 [file get_supplementary_file.php]

Table S1. Reagents for PSC NPs synthesis.

| Category | Name | Brand | Catalog No. |
| --- | --- | --- | --- |
| Chemical  reagent | Polylactic acid-glycolic acid (PLGA)-PEG-COOH | Xi’an Ruixibio Biotechnology | R-PL1063-20.4K |
| Chemical  reagent | superparamagnetic iron oxide (SPIO) | Xi’an Ruixibio Biological Technology | R-PL1063 |
| Chemical  reagent | Dichloromethane (CH2Cl2) | China National Pharmaceutical Group Corporation | 80047318 |
| Chemical  reagent | Polyvinyl Alcohol (PVA) | Shanghai Macklin | P823117 |
| Chemical  reagent | Cypate | Home-made |  |
| Chemical  reagent | Isopropyl alcohol | Shanghai Macklin | I811925 |
| Chemical  reagent | Hydrochloric acid (HCl) | China National Pharmaceutical Group Corporation | 10011028 |

**
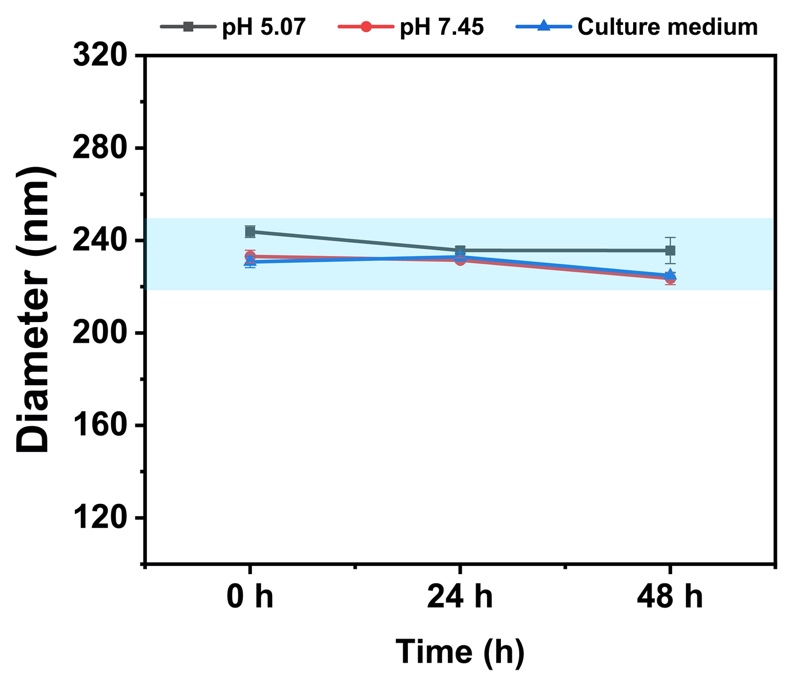
**

**Figure S1. The stability of PSC NPs in different media.** No significant change in particle size was detected after 48 hours’ incubation (n=3 technical repeats). Data shown represent means ± SD.

**
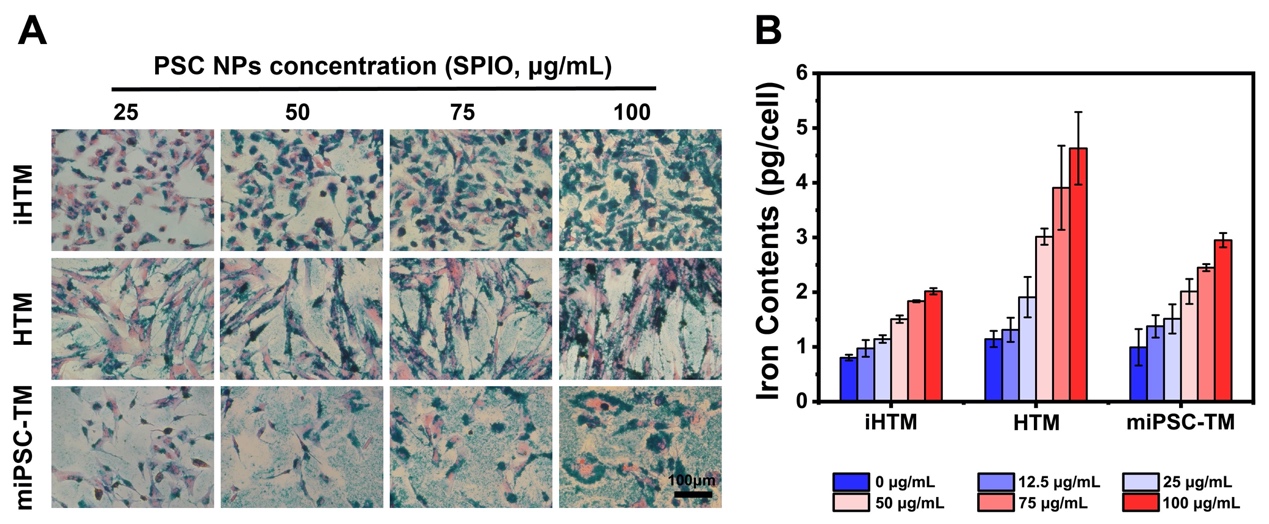
**

**Figure S2. Prussian blue staining and iron quantification.** (A). Prussian blue staining of iHTM, HTM, and miPSC-TM cells labeled with PSC NPs at a series of concentrations (25, 50, 75, and 100 μg/mL). Cell morphology after labeling is not changed. Blue granules indicating PSC NPs are evident in the cytoplasm pre-stained with Eosin (Pink). (B). Iron contents in iHTM, HTM, and miPSC-TM labeled with PSC NPs at a series of concentrations (0, 12.5, 25, 50, 75, and 100 μg/mL) are determined by thiocyanate colorimetry. The iron uptake is increased as PSC NPs increased. Data represent the mean ± SD. Typical results from n=3 technical repeats are shown.

**
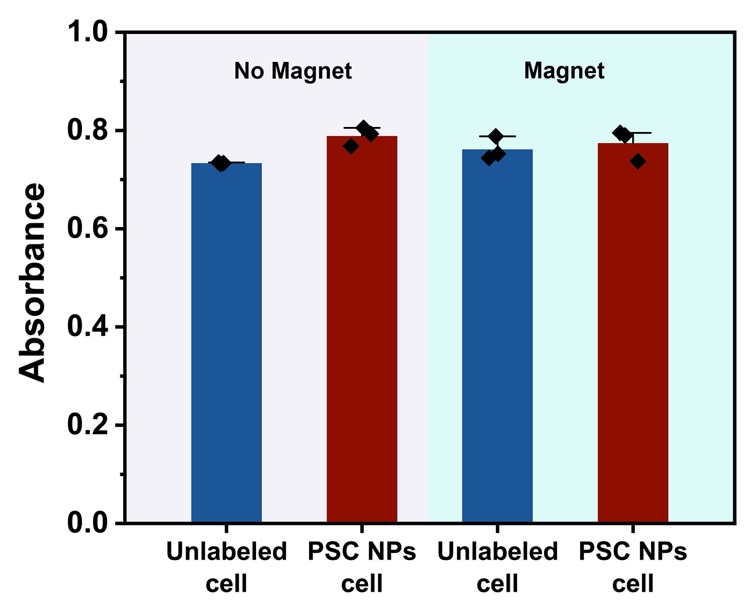
**

**Figure S3. The influence of the magnet on cell viability of NP-labeled HTM.** HTM cells were labeled with PSC NPs (35 μg/mL; 10 hours). In the presence of a magnet (189 mT magnetic strength) for 48 hours, cell viability was determined by CCK-8 assay. Compared to no magnet control, cell viability cannot be affected by this magnetic strength. Typical results from n=3 technical repeats are shown. *P* > 0.05 by one-way ANOVA.

**
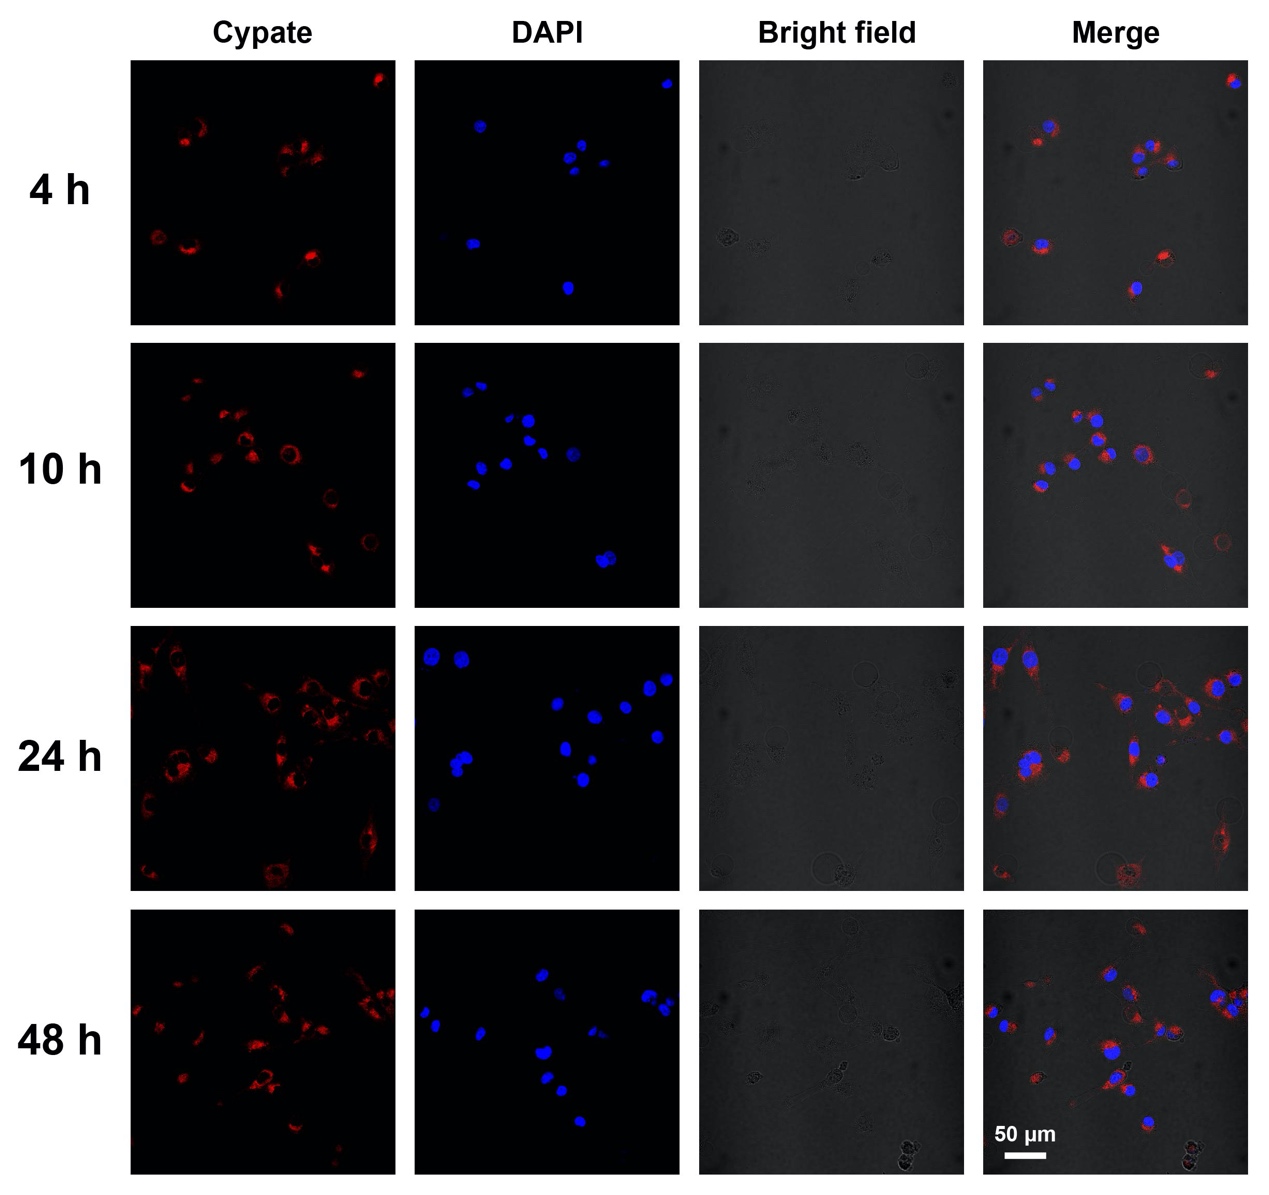
**

**Figure S4. Confocal images of PSC NPs-labeled iHTM.** After incubation for 4, 10, 24, 48 hours, PSC NPs accumulated in the cytoplasm are shown in red. Nuclei are labeled with DAPI (blue). Scale bars: 50 μm.

**
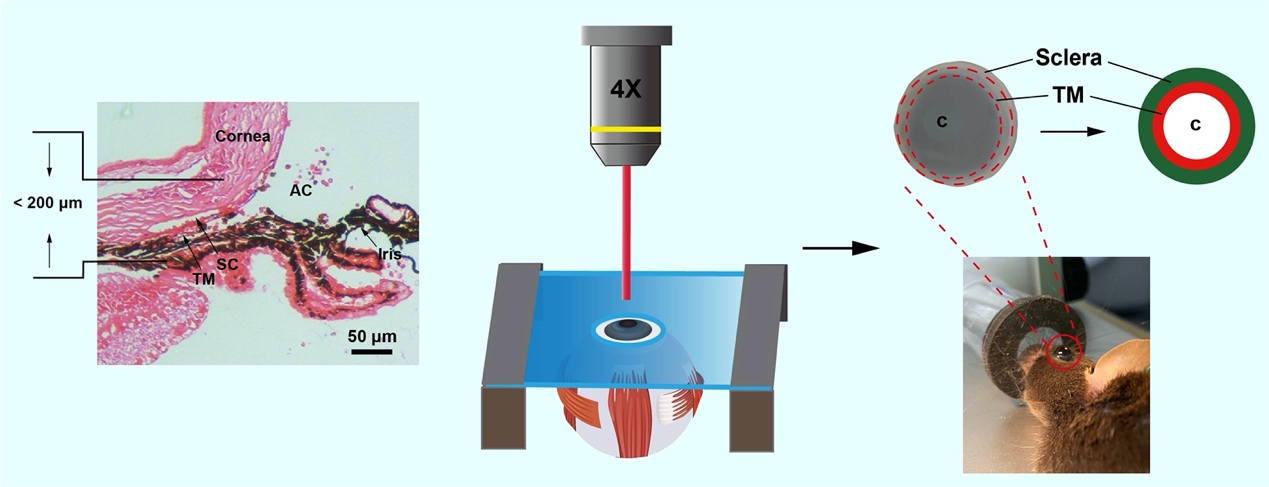
**

**Figure S5. Schematic diagram of near-infrared imaging (Left panel) and definition of the TM region in living mice (Right panel; see details in methods).**
